# Supplementary material
Source: Springer Nature journal article supplement (https://www.springermedizin.de/resource/supplementary/12894_2013_406_MOESM2_ESM.pdf/9513486)

Cumulative incidence

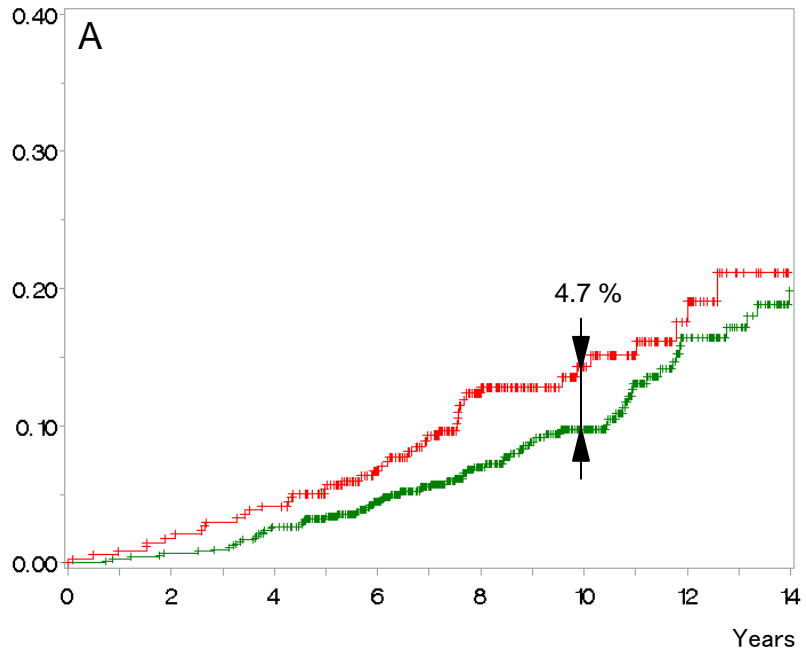

No. at risk: 1052 1041 1016 848 584 373 189 97

Cumulative incidence

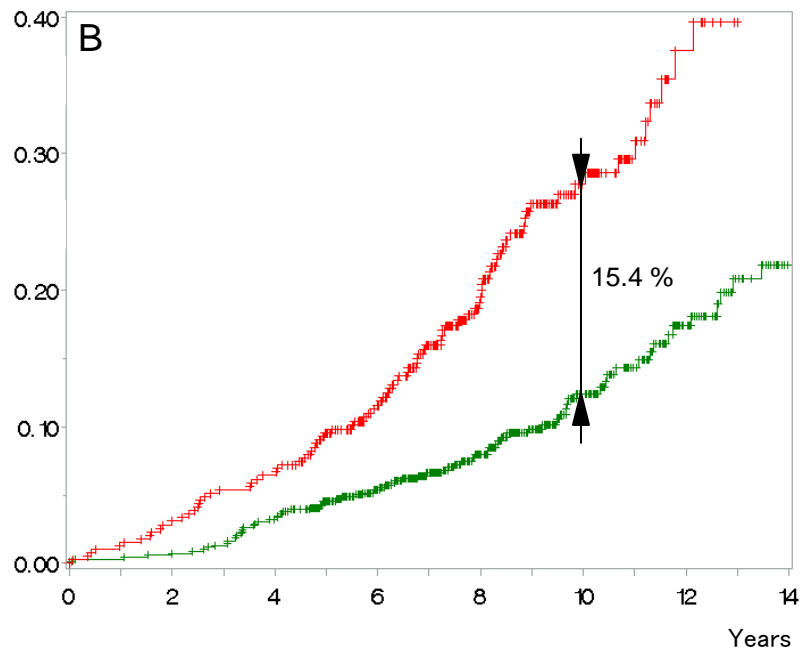

1079 1061 1030 853 556 306 145 75

Supplement: MOESM2 [file 9513486]
